# Supplementary material for: Enhanced reactive adsorption of H2S on Cu–BTC/ S- and N-doped GO composites
Source: Royal Society of Chemistry journal article supplement (doi:10.1039/c5ta01359c), 2015-01-01
Supplement: c5ta01359c1.pdf [file c5ta01359c1.pdf]

**Supplementary Information for**  
**Enhanced Reactive Adsorption of H<sub>2</sub>S on Cu-BTC/ S- and N- doped GO**  
**composites**

Amani M. Ebrahim<sup>1</sup>, Jacek Jagiello<sup>2</sup> and Teresa J. Bandosz<sup>1\*</sup>

<sup>1</sup> Department of Chemistry,  
The City College of New York  
160 Convent Ave  
New York, NY 10031

<sup>2</sup> Micrometrics Instrument Corporation  
Norcross, GA 30093 (USA)

E-mail: [tbandosz@ccny.cuny.edu](mailto:tbandosz@ccny.cuny.edu)

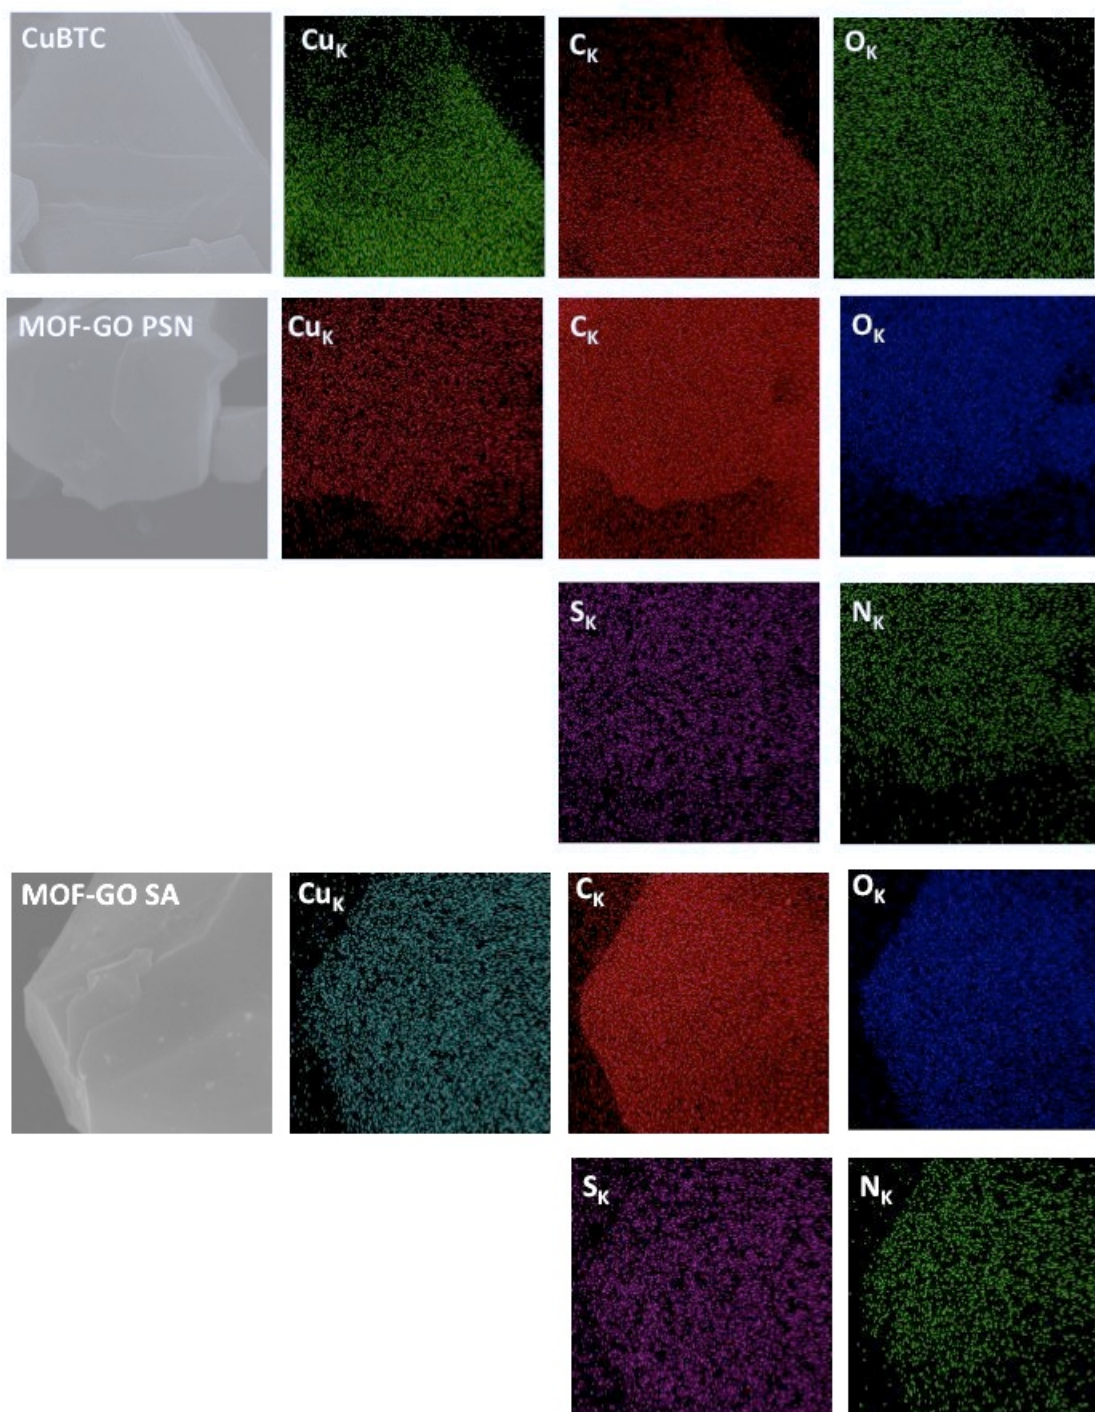

Figure S1. EDS maps of the elements for parent MOF and composites.

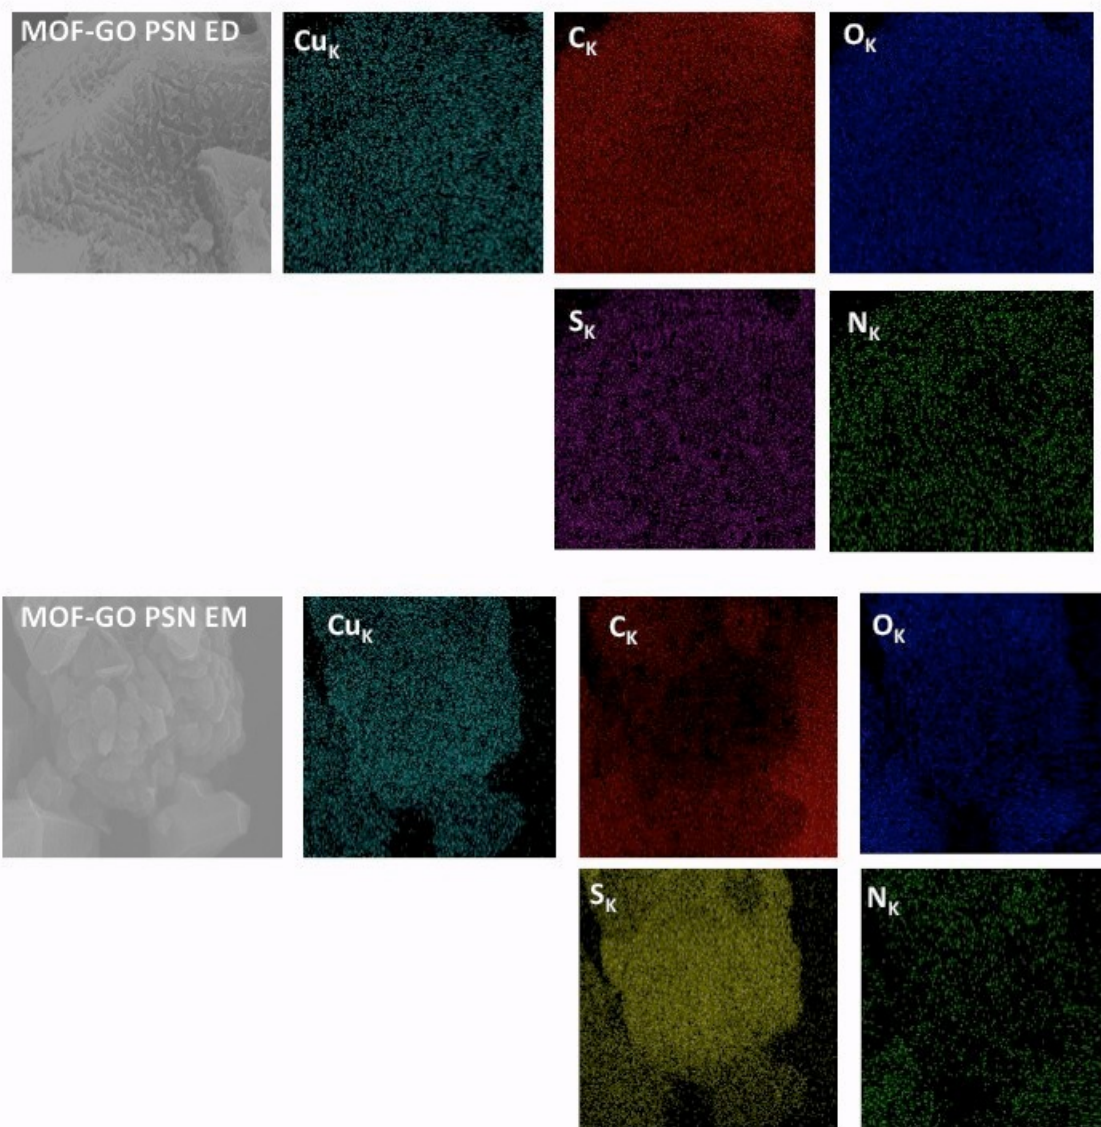

Figure S2. EDS maps of the elements for MOF-GOPSN after exposure to H<sub>2</sub>S.

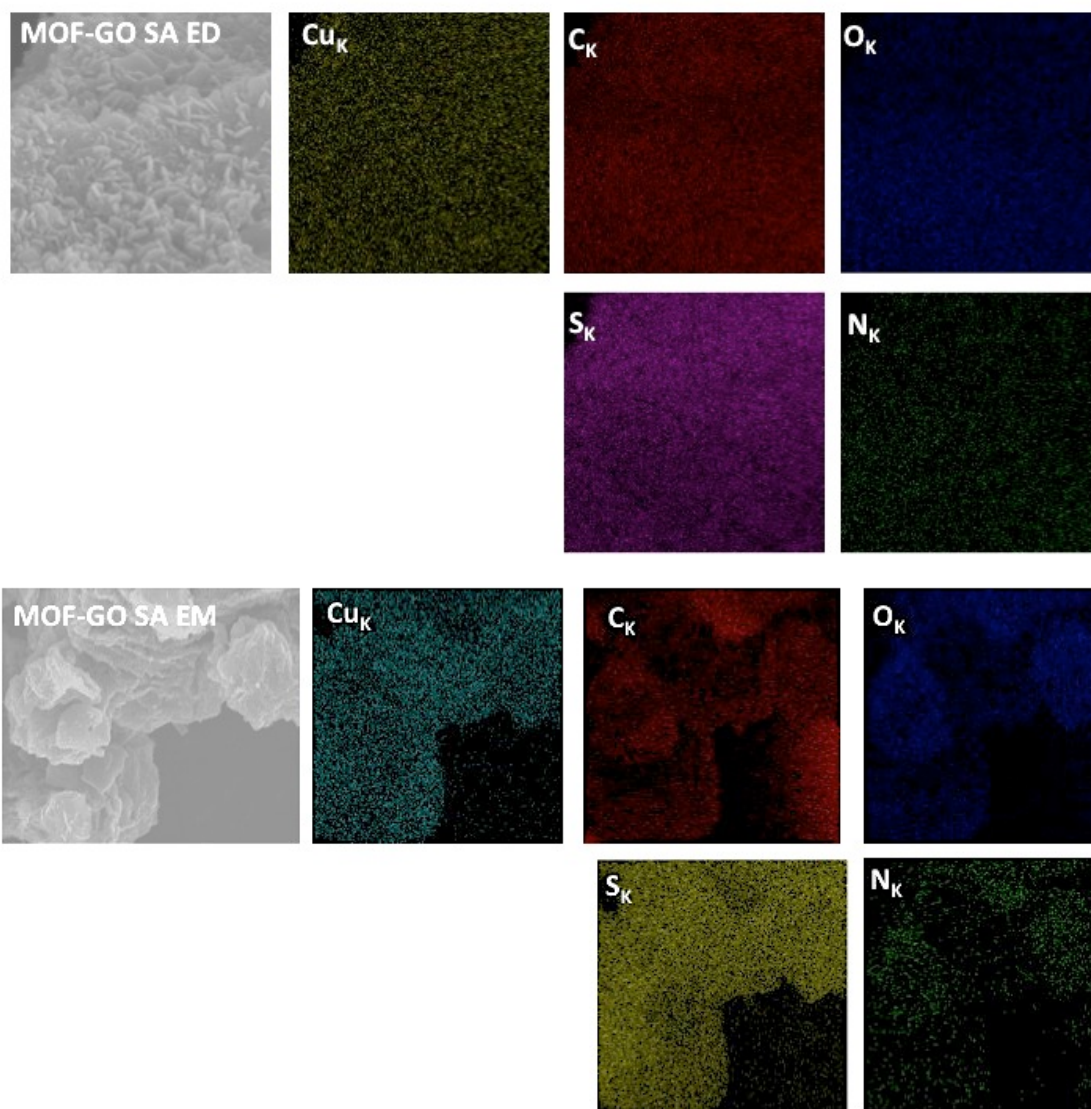

Figure S3. EDS maps of the elements for MOF-GOSA after exposure to H<sub>2</sub>S.

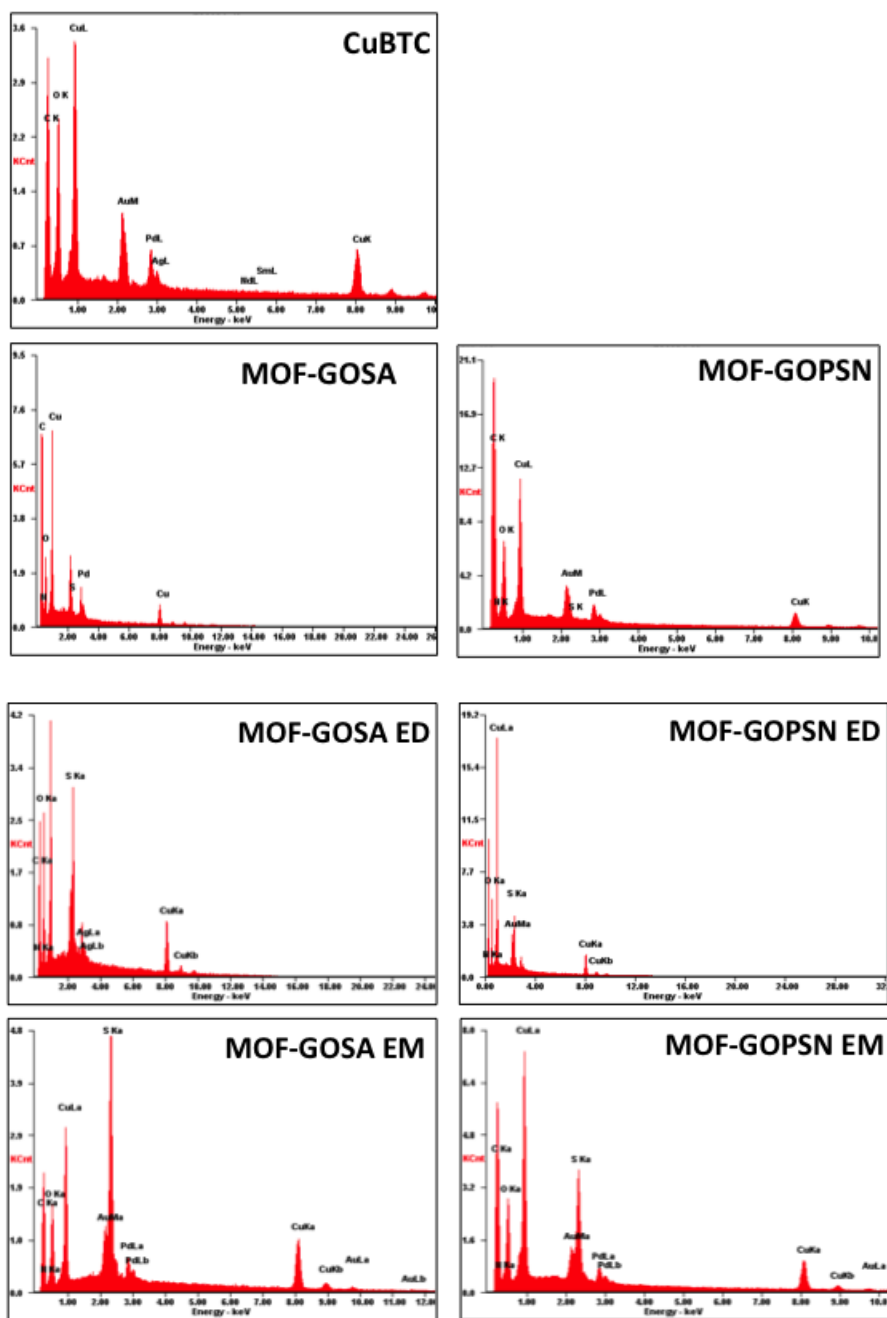

Figure S4. EDS Spectra for the composites before and after exposure to H<sub>2</sub>S
